# Supplementary material for: Co-Encapsulation of Chlorin e6 and Chemotherapeutic Drugs in a PEGylated Liposome Enhance the Efficacy of Tumor Treatment: Pharmacokinetics and Therapeutic Efficacy
Source: PubMed Central journal article supplement (PMC6920861; doi:10.3390/pharmaceutics11110617), 2019-11-17
Supplement: pharmaceutics-11-00617-s001.pdf [file pharmaceutics-11-00617-s001.pdf]

# Supplementary Materials: Co-Encapsulation of Chlorin e6 and Chemotherapeutic Drugs in a PEGylated Liposome Enhance the Efficacy of Tumor Treatment: Pharmacokinetics and Therapeutic Efficacy

Po-Chun Peng <sup>1</sup>, Ruey-Long Hong <sup>2</sup>, Tsuimin Tsai <sup>3</sup> and Chin-Tin Chen <sup>1,\*</sup>

**Table S1.** Biodistribution of Dox and Ce6 at different time points in BALB/c mice bearing syngeneic C26 tumor after intravenous injection of PL-Dox-Ce6 ( $N = 3$ ).

| Hours after injection | Plasma (g/mL) | Tumor (g/g) | Liver (g/g)  | Heart (g/g)  | Kidney (g/g) | Lung (g/g)  | Muscle (g/g) | Skin (g/g)  |
|-----------------------|---------------|-------------|--------------|--------------|--------------|-------------|--------------|-------------|
| <b>Ce6</b>            |               |             |              |              |              |             |              |             |
| 2 h                   | 12.2 ± 11.45  | 0.47 ± 0.08 | 3.63 ± 0.16  | 0.24 ± 0.08  | 1.20 ± 0.37  | 0.42 ± 0.10 | 0.03 ± 0.01  | 0.19 ± 0.02 |
|                       | 4.47 ± 0.32   | 0.87 ± 0.14 | 3.17 ± 0.08  | N/A          | 0.72 ± 0.13  | 0.08 ± 0.02 | N/A          | 0.05 ± 0.01 |
| 12 h                  | 2.05 ± 0.20   | 0.97 ± 0.10 | 2.81 ± 0.27  | N/A          | 0.48 ± 0.05  | 0.06 ± 0.03 | N/A          | 0.04 ± 0.02 |
|                       | 1.36 ± 0.21   | 0.91 ± 0.12 | 1.66 ± 0.09  | N/A          | 0.16 ± 0.07  | 0.01 ± 0.00 | N/A          | N/A         |
| 48 h                  | 0.19 ± 0.02   | 0.24 ± 0.05 | 1.25 ± 0.09  | N/A          | N/A          | N/A         | N/A          | N/A         |
|                       | <b>Dox</b>    |             |              |              |              |             |              |             |
| 2 h                   | 51.57 ± 3.57  | 2.41 ± 0.60 | 21.53 ± 3.48 | 0.71 ± 0.11  | 5.10 ± 1.11  | 3.11 ± 0.36 | 0.62 ± 0.21  | 1.14 ± 0.26 |
|                       | 29.43 ± 2.61  | 6.26 ± 1.60 | 28.52 ± 2.97 | 0.14 ± 0.07  | 4.83 ± 0.70  | 2.27 ± 0.22 | 0.39 ± 0.24  | 0.91 ± 0.07 |
| 12 h                  | 17.09 ± 1.25  | 8.81 ± 1.10 | 33.64 ± 1.56 | 0.10 ± 0.08  | 4.39 ± 0.28  | 2.16 ± 0.10 | 0.30 ± 0.12  | 0.80 ± 0.12 |
|                       | 8.94 ± 2.74   | 8.74 ± 1.68 | 19.62 ± 0.92 | 0.01 ± 0.04  | 2.73 ± 0.90  | 0.67 ± 0.21 | 0.02 ± 0.10  | 0.79 ± 0.06 |
| 48 h                  | 1.67 ± 0.91   | 2.60 ± 0.70 | 18.70 ± 1.46 | -0.04 ± 0.08 | 0.75 ± 0.09  | 0.35 ± 0.15 | 0.02 ± 0.07  | 0.58 ± 0.12 |

**Table S2.** Time course of Ce6 and Dox concentrations in different tissues of C26 tumor-bearing mice without or with light irradiation at 2 h after intravenous injection of PL-Dox-Ce6 ( $N = 3$ ).

| Group         | Drug | Hours after injection | Plasma (g/mL) | Tumor (g/g) | Liver (g/g) | Heart (g/g) | Spleen (g/g) | Kidney (g/g) | Lung (g/g)  |
|---------------|------|-----------------------|---------------|-------------|-------------|-------------|--------------|--------------|-------------|
| without light | Ce6  | 2 h                   | 6.65 ± 0.79   | 0.28 ± 0.08 | 1.62 ± 0.26 | 0.14 ± 0.01 | 3.63 ± 0.08  | 0.96 ± 0.07  | 0.27 ± 0.07 |
|               |      |                       | 5.35 ± 0.22   | 0.43 ± 0.07 | 2.11 ± 0.06 | 0.06 ± 0.01 | 4.17 ± 0.23  | 0.82 ± 0.04  | 0.18 ± 0.03 |
|               |      | 4 h                   | 6.65 ± 0.79   | 0.28 ± 0.08 | 1.62 ± 0.26 | 0.14 ± 0.01 | 3.63 ± 0.08  | 0.96 ± 0.07  | 0.27 ± 0.07 |
|               |      |                       | 5.35 ± 0.22   | 0.43 ± 0.07 | 2.11 ± 0.06 | 0.06 ± 0.01 | 4.17 ± 0.23  | 0.82 ± 0.04  | 0.18 ± 0.03 |

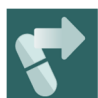

|                   |      |              |              |              |             |              |             |             |
|-------------------|------|--------------|--------------|--------------|-------------|--------------|-------------|-------------|
|                   | 6 h  | 4.00 ± 0.62  | 0.53 ± 0.03  | 2.25 ± 0.39  | 0.04 ± 0.00 | 4.15 ± 0.08  | 0.58 ± 0.13 | 0.12 ± 0.02 |
|                   | 8 h  | 3.55 ± 0.45  | 0.59 ± 0.09  | 2.27 ± 0.20  | 0.02 ± 0.01 | 4.35 ± 0.14  | 0.38 ± 0.06 | 0.07 ± 0.03 |
|                   | 12 h | 2.53 ± 0.98  | 0.67 ± 0.04  | 2.16 ± 0.35  | 0.02 ± 0.02 | 3.95 ± 0.40  | 0.31 ± 0.07 | 0.04 ± 0.02 |
|                   | 24 h | 0.87 ± 0.07  | 0.57 ± 0.08  | 2.09 ± 0.09  | N/A         | 3.32 ± 0.29  | 0.11 ± 0.04 | 0.04 ± 0.01 |
|                   | 48 h | 0.72 ± 0.07  | 0.30 ± 0.08  | 1.04 ± 0.20  | N/A         | 2.07 ± 0.10  | 0.06 ± 0.02 | N/A         |
|                   | 2 h  | 60.16 ± 6.64 | 2.45 ± 0.30  | 15.08 ± 1.54 | 1.52 ± 0.04 | 27.20 ± 0.60 | 5.38 ± 0.63 | 3.96 ± 0.69 |
|                   | 4 h  | 51.54 ± 3.31 | 5.36 ± 1.42  | 24.52 ± 0.40 | 1.39 ± 0.04 | 29.77 ± 0.91 | 5.01 ± 0.92 | 3.55 ± 0.55 |
|                   | 6 h  | 46.85 ± 2.15 | 7.33 ± 1.05  | 27.56 ± 4.31 | 1.15 ± 0.01 | 33.42 ± 0.33 | 5.44 ± 0.76 | 3.32 ± 0.30 |
| <b>Dox</b>        | 8 h  | 40.47 ± 5.86 | 8.48 ± 1.05  | 28.76 ± 2.00 | 0.91 ± 0.12 | 33.55 ± 1.44 | 4.72 ± 1.12 | 3.27 ± 0.30 |
|                   | 12 h | 31.63 ± 4.92 | 9.57 ± 1.70  | 29.92 ± 3.67 | 0.79 ± 0.18 | 35.96 ± 0.92 | 4.31 ± 0.79 | 2.78 ± 0.67 |
|                   | 24 h | 18.82 ± 5.69 | 8.96 ± 1.68  | 32.84 ± 0.97 | 0.59 ± 0.16 | 29.41 ± 1.77 | 3.80 ± 0.29 | 1.82 ± 0.16 |
|                   | 48 h | 13.45 ± 1.05 | 3.98 ± 1.09  | 24.87 ± 1.55 | 0.38 ± 0.12 | 24.29 ± 1.49 | 2.21 ± 0.27 | 0.58 ± 0.36 |
|                   | 4 h  | 3.97 ± 0.46  | 0.79 ± 0.11  | 2.21 ± 0.11  | 0.06 ± 0.01 | 4.08 ± 0.44  | 0.52 ± 0.05 | 0.16 ± 0.02 |
|                   | 6 h  | 3.59 ± 0.41  | 0.75 ± 0.16  | 2.02 ± 0.23  | 0.01 ± 0.01 | 3.77 ± 0.18  | 0.44 ± 0.04 | 0.09 ± 0.03 |
|                   | 8 h  | 3.12 ± 0.17  | 0.83 ± 0.11  | 1.93 ± 0.13  | 0.01 ± 0.01 | 3.68 ± 0.31  | 0.35 ± 0.07 | 0.07 ± 0.03 |
| <b>Ce6</b>        | 12 h | 2.18 ± 0.21  | 1.06 ± 0.15  | 1.72 ± 0.26  | 0.01 ± 0.01 | 3.19 ± 0.01  | 0.19 ± 0.04 | 0.06 ± 0.04 |
|                   | 24 h | 0.67 ± 0.01  | 1.09 ± 0.12  | 1.59 ± 0.15  | N/A         | 2.65 ± 0.22  | 0.04 ± 0.01 | 0.02 ± 0.01 |
|                   | 48 h | 0.19 ± 0.06  | 0.88 ± 0.05  | 0.88 ± 0.19  | N/A         | 1.91 ± 0.11  | N/A         | 0.01 ± 0.02 |
| <b>with light</b> | 4 h  | 48.69 ± 3.36 | 10.98 ± 1.02 | 27.67 ± 2.06 | 1.26 ± 0.03 | 33.13 ± 2.33 | 5.21 ± 0.23 | 3.42 ± 0.45 |
|                   | 6 h  | 45.52 ± 1.49 | 10.55 ± 1.97 | 28.51 ± 2.56 | 1.02 ± 0.14 | 31.20 ± 2.67 | 5.11 ± 0.68 | 3.41 ± 0.46 |
|                   | 8 h  | 39.40 ± 5.68 | 12.74 ± 1.12 | 27.15 ± 1.44 | 0.58 ± 0.16 | 30.89 ± 1.94 | 4.68 ± 1.05 | 3.02 ± 0.57 |
| <b>Dox</b>        | 12 h | 28.58 ± 3.07 | 15.29 ± 2.10 | 28.48 ± 3.18 | 0.34 ± 0.10 | 29.89 ± 2.70 | 4.58 ± 0.49 | 2.69 ± 0.35 |
|                   | 24 h | 14.93 ± 0.60 | 17.93 ± 1.10 | 29.02 ± 1.85 | 0.37 ± 0.11 | 25.58 ± 2.34 | 3.23 ± 0.38 | 1.99 ± 0.41 |
|                   | 48 h | 7.49 ± 0.80  | 18.30 ± 0.91 | 20.36 ± 1.06 | 0.23 ± 0.10 | 22.70 ± 1.38 | 2.30 ± 0.19 | 0.48 ± 0.21 |

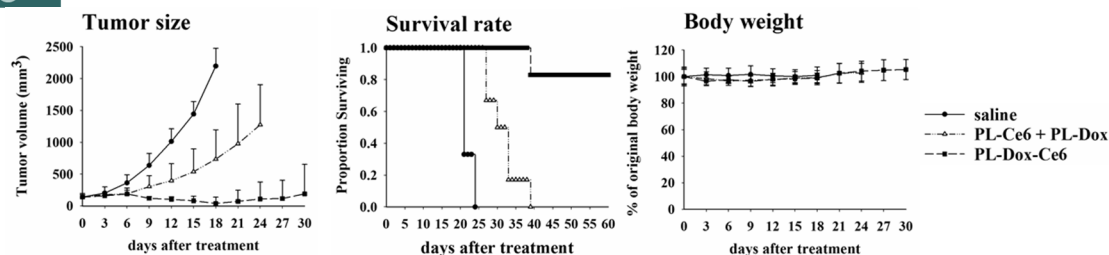

**Figure S1.** Therapeutical efficacy of PL-Dox-Ce6 on nu/nu nude mice bearing human H460 human lung cancer cells. After liposomal drug (Ce6: 1.75 mg/kg and Dox: 8.2 mg/kg) injection, light irradiation was applied onto the tumor at 2 h and 12 h, respectively. Left panel, tumor size; Middle panel, survival rate; Right panel, body weight. The results are represented as the mean  $\pm$  S.D. for each group ( $N = 6$ ). The mean tumor size in PL-Dox-Ce6 treating groups were significantly smaller than the control-saline group ( $P < 0.001$ ). Complete tumor regression was observed in 5/6 mice treated with PL-Dox-Ce6, resulting in apparent cure with clear superiority over the treatment of PL-Dox and PL-Ce6 in combination.

**Table S3.** Particle size and entrapment of PL-Ce6, PL-cDDP and PL-cDDP-Ce6 ( $N = 3$ ).

| Liposome    | Particle size (nm) | Lipid recovery (%) | Ce6 entrapment (g/mol) | Ce6 entrapment efficiency (%) | cDDP entrapment (g/mol) | cDDP entrapment efficiency (%) |
|-------------|--------------------|--------------------|------------------------|-------------------------------|-------------------------|--------------------------------|
| PL-Ce6      | 150 $\pm$ 29.7     | 83.5 $\pm$ 2.5     | 6.8 $\pm$ 0.2          | 87 $\pm$ 2.8                  |                         |                                |
| PL-cDDP     | 132.6 $\pm$ 27.3   | 82 $\pm$ 3.1       |                        |                               | 11.9 $\pm$ 1.3          | 15.1 $\pm$ 1.7                 |
| PL-cDDP-Ce6 | 147.3 $\pm$ 31.5   | 81.5 $\pm$ 2.1     | 6.6 $\pm$ 0.2          | 84.8 $\pm$ 2                  | 13.9 $\pm$ 1.2          | 17.7 $\pm$ 1.5                 |

**Table S4.** Stability and particle size of PL-cDDP-Ce6 at 4°C ( $N = 3$ ).

| Stability of PL-cDDP-Ce6 | Days         |               |             |               |               |               |                |                |
|--------------------------|--------------|---------------|-------------|---------------|---------------|---------------|----------------|----------------|
|                          | 0            | 1             | 3           | 7             | 14            | 21            | 30             | 60             |
| Leakage of Ce6 (%)       | 0.00         | 2.7 $\pm$ 1.1 | 5 $\pm$ 1.9 | 5.5 $\pm$ 2.1 | 4.9 $\pm$ 2.2 | 9.1 $\pm$ 2.7 | 11.1 $\pm$ 1.7 | 12.5 $\pm$ 1.5 |
| Leakage of cDDP (%)      | 0.00         | 4.8 $\pm$ 0.6 | 5.7 $\pm$ 1 | 5.8 $\pm$ 1.8 | 8.3 $\pm$ 1.8 | 6.8 $\pm$ 1.7 | 10.2 $\pm$ 0.9 | 12.4 $\pm$ 0.9 |
| Particle size (nm)       | 148 $\pm$ 10 |               |             | 145 $\pm$ 5   | 148 $\pm$ 9   | 150 $\pm$ 7   | 150 $\pm$ 9    | 150 $\pm$ 14   |

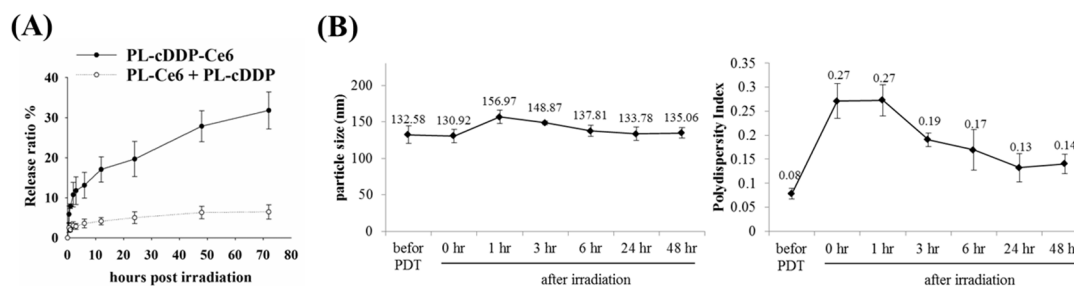

**Figure S2.** Release profile, alterations of particle size and polydispersities (PDI) of PL-cDDP-Ce6 after light irradiation (10 J/cm<sup>2</sup>). (A) the kinetics of cDDP released from PL-cDDP-Ce6 (●) or PL-cDDP and PL-Ce6 in combination (○) after light irradiation. (B) Mean size (Middle panel) and related PDI (Right

panel) of PL-cDDP-Ce6 at different time points after light irradiation. The results are represented as the mean  $\pm$  S.D. for each group.

**Table S5.** Concentration of cDDP and Ce6 at different time points in BALB/c mice bearing syngeneic C26 tumor after intravenous injection of PL-cDDP-Ce6 ( $N = 3$ ).

| Hours after injection | Plasma (g/mL)    | Tumor (g/g)     | Liver (g/g)      | Heart (g/g)     | Spleen (g/g)     | Kidney (g/g)    | Lung (g/g)      |  |
|-----------------------|------------------|-----------------|------------------|-----------------|------------------|-----------------|-----------------|--|
| <b>Ce6</b>            |                  |                 |                  |                 |                  |                 |                 |  |
| 2 h                   | 17.44 $\pm$ 1.59 | 0.90 $\pm$ 0.10 | 2.93 $\pm$ 0.44  | 0.22 $\pm$ 0.02 | 3.63 $\pm$ 0.52  | 2.34 $\pm$ 0.40 | 0.60 $\pm$ 0.04 |  |
|                       | 9.24 $\pm$ 1.31  | 1.22 $\pm$ 0.13 | 1.83 $\pm$ 0.10  | 0.09 $\pm$ 0.01 | 3.25 $\pm$ 0.31  | 0.65 $\pm$ 0.12 | 0.44 $\pm$ 0.09 |  |
| 6 h                   | 4.92 $\pm$ 0.90  | 1.39 $\pm$ 0.15 | 1.07 $\pm$ 0.22  | 0.04 $\pm$ 0.02 | 2.92 $\pm$ 0.27  | 0.36 $\pm$ 0.02 | 0.26 $\pm$ 0.04 |  |
|                       | 3.06 $\pm$ 0.18  | 1.24 $\pm$ 0.14 | 0.73 $\pm$ 0.07  | N/A             | 2.25 $\pm$ 0.48  | 0.20 $\pm$ 0.09 | 0.19 $\pm$ 0.06 |  |
| 12 h                  | 2.82 $\pm$ 0.09  | 0.52 $\pm$ 0.16 | 0.48 $\pm$ 0.08  | N/A             | 1.96 $\pm$ 0.13  | 0.15 $\pm$ 0.02 | 0.09 $\pm$ 0.07 |  |
|                       | <b>cDDP</b>      |                 |                  |                 |                  |                 |                 |  |
| 2 h                   | 35.00 $\pm$ 4.33 | 2.19 $\pm$ 0.92 | 22.79 $\pm$ 0.78 | N/A             | 12.94 $\pm$ 2.24 | 9.30 $\pm$ 1.48 | 1.52 $\pm$ 0.24 |  |
|                       | 23.80 $\pm$ 0.71 | 4.17 $\pm$ 0.87 | 21.01 $\pm$ 2.29 | N/A             | 19.45 $\pm$ 3.19 | 5.52 $\pm$ 1.48 | 1.71 $\pm$ 0.52 |  |
| 6 h                   | 18.08 $\pm$ 3.24 | 5.29 $\pm$ 0.84 | 11.08 $\pm$ 2.45 | N/A             | 25.99 $\pm$ 3.80 | 3.53 $\pm$ 1.24 | 2.40 $\pm$ 0.34 |  |
|                       | 15.98 $\pm$ 1.09 | 4.80 $\pm$ 0.99 | 9.16 $\pm$ 0.66  | N/A             | 14.16 $\pm$ 1.12 | 0.77 $\pm$ 0.23 | 1.57 $\pm$ 0.37 |  |
| 12 h                  | 11.35 $\pm$ 1.05 | 3.39 $\pm$ 0.51 | 8.32 $\pm$ 1.05  | N/A             | 8.53 $\pm$ 0.96  | N/A             | N/A             |  |
|                       |                  |                 |                  |                 |                  |                 |                 |  |
| 24 h                  |                  |                 |                  |                 |                  |                 |                 |  |
|                       |                  |                 |                  |                 |                  |                 |                 |  |
| 48 h                  |                  |                 |                  |                 |                  |                 |                 |  |
|                       |                  |                 |                  |                 |                  |                 |                 |  |

**Table S6.** Time course of Ce6 and cDDP concentrations in different tissues of C26 tumor-bearing mice without or with light irradiation at 2 h after intravenous injection of PL-cDDP-Ce6 ( $N = 3$ ).

| Group         | Drug | Hours after injection | Plasma (g/mL)    | Tumor (g/g)     | Liver (g/g)     | Kidney (g/g)    | Spleen (g/g)    |
|---------------|------|-----------------------|------------------|-----------------|-----------------|-----------------|-----------------|
| without light | Ce6  | 2 h                   | 13.36 $\pm$ 1.14 | 0.46 $\pm$ 0.06 | 3.56 $\pm$ 0.19 | 0.99 $\pm$ 0.12 | 3.94 $\pm$ 0.18 |
|               |      | 4 h                   | 10.18 $\pm$ 0.95 | 0.62 $\pm$ 0.05 | 3.69 $\pm$ 0.19 | 0.54 $\pm$ 0.06 | 4.19 $\pm$ 0.27 |
|               |      | 6 h                   | 7.31 $\pm$ 1.03  | 0.75 $\pm$ 0.10 | 3.37 $\pm$ 0.25 | 0.44 $\pm$ 0.05 | 3.86 $\pm$ 0.23 |
|               |      | 8 h                   | 6.09 $\pm$ 1.15  | 0.75 $\pm$ 0.11 | 3.19 $\pm$ 0.19 | 0.39 $\pm$ 0.07 | 3.79 $\pm$ 0.25 |
|               |      | 12 h                  | 4.73 $\pm$ 0.53  | 0.95 $\pm$ 0.14 | 3.03 $\pm$ 0.36 | 0.28 $\pm$ 0.09 | 3.56 $\pm$ 0.29 |
|               |      | 24 h                  | 3.80 $\pm$ 0.18  | 0.87 $\pm$ 0.16 | 2.15 $\pm$ 0.33 | 0.22 $\pm$ 0.05 | 3.13 $\pm$ 0.35 |
|               |      | 48 h                  | 2.35 $\pm$ 0.48  | 0.35 $\pm$ 0.15 | 1.75 $\pm$ 0.27 | 0.19 $\pm$ 0.04 | 2.62 $\pm$ 0.27 |

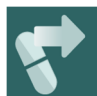

|            |      |              |              |              |             |              |
|------------|------|--------------|--------------|--------------|-------------|--------------|
| cDDP       | 2 h  | 31.02 ± 1.73 | 2.66 ± 0.79  | 24.24 ± 2.78 | 8.05 ± 1.06 | 15.53 ± 1.93 |
|            | 4 h  | 23.80 ± 0.83 | 3.87 ± 0.60  | 21.79 ± 3.19 | 6.25 ± 1.14 | 17.35 ± 2.50 |
|            | 6 h  | 21.10 ± 1.79 | 4.94 ± 0.86  | 22.34 ± 2.19 | 5.38 ± 0.90 | 17.68 ± 2.15 |
|            | 8 h  | 17.47 ± 2.11 | 5.58 ± 1.45  | 18.18 ± 1.37 | 3.97 ± 1.60 | 20.37 ± 2.47 |
|            | 12 h | 14.17 ± 0.97 | 5.95 ± 1.17  | 14.77 ± 0.96 | 2.77 ± 0.73 | 21.37 ± 3.60 |
|            | 24 h | 9.84 ± 1.46  | 5.56 ± 0.82  | 12.53 ± 0.83 | 1.10 ± 0.53 | 17.52 ± 2.47 |
|            | 48 h | 5.83 ± 1.60  | 3.60 ± 0.76  | 11.00 ± 2.74 | 0.74 ± 0.10 | 14.78 ± 1.52 |
| Ce6        | 4 h  | 8.77 ± 0.59  | 0.87 ± 0.07  | 3.37 ± 0.21  | 0.68 ± 0.04 | 3.54 ± 0.24  |
|            | 6 h  | 6.54 ± 0.78  | 0.91 ± 0.18  | 3.08 ± 0.33  | 0.41 ± 0.09 | 3.35 ± 0.31  |
|            | 8 h  | 5.25 ± 0.76  | 1.29 ± 0.06  | 2.72 ± 0.10  | 0.26 ± 0.06 | 3.18 ± 0.19  |
|            | 12 h | 4.90 ± 0.54  | 1.30 ± 0.14  | 2.46 ± 0.23  | 0.21 ± 0.09 | 3.16 ± 0.23  |
|            | 24 h | 3.80 ± 0.64  | 1.16 ± 0.18  | 2.01 ± 0.21  | 0.19 ± 0.05 | 2.81 ± 0.20  |
|            | 48 h | 1.82 ± 0.33  | 0.61 ± 0.12  | 1.67 ± 0.10  | 0.16 ± 0.05 | 2.53 ± 0.14  |
| with light | 4 h  | 20.09 ± 1.67 | 9.34 ± 1.39  | 18.87 ± 2.79 | 8.76 ± 1.39 | 17.97 ± 1.89 |
|            | 6 h  | 19.08 ± 1.16 | 9.29 ± 1.33  | 16.80 ± 2.58 | 6.01 ± 1.33 | 13.44 ± 0.80 |
|            | 8 h  | 16.64 ± 3.21 | 13.45 ± 3.57 | 14.81 ± 1.37 | 3.06 ± 0.77 | 14.52 ± 1.87 |
|            | 12 h | 12.04 ± 2.55 | 15.87 ± 2.99 | 11.81 ± 1.64 | 1.97 ± 0.61 | 14.61 ± 2.38 |
|            | 24 h | 8.27 ± 1.94  | 13.88 ± 3.57 | 11.03 ± 2.07 | 0.89 ± 0.39 | 13.93 ± 1.90 |
|            | 48 h | 4.84 ± 0.68  | 9.96 ± 2.20  | 9.63 ± 2.26  | 0.88 ± 0.35 | 11.51 ± 1.36 |

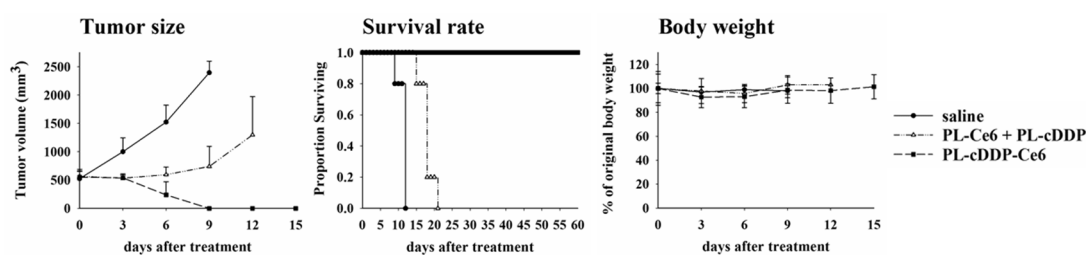

**Figure S3.** Therapeutic efficacy of PL-cDDP-Ce6 on nu/nu nude mice bearing H460 tumors with average tumor size of 500 mm<sup>3</sup> before drug administration. After liposomal drug (Ce6: 1.75 mg/kg and cDDP: 6.34 mg/kg) injection, light irradiation (100 J/cm<sup>2</sup>) was applied onto the tumor at 2 h and 12 h, respectively. Left panel, tumor size; Middle panel, survival rate; Right panel, body weight. The

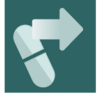

results are represented as the mean  $\pm$  S.D. for each group ( $N = 5$ ). Statistical analysis was performed by two-way ANOVA. Complete tumor regression was observed in all mice treated with PL-cDDP-Ce6, resulting in apparent cure with clear superiority over the treatment of PL-cDDP and PL-Ce6 in combination.
